# Supplementary material for: A novel electrochemiluminescence sensor based on a molecular imprinting technique and UCNPs@ZIF-8 nanocomposites for sensitive determination of imidacloprid
Source: Royal Society of Chemistry journal article supplement (doi:10.1039/d2an01005d), 2022-01-01
Supplement: d2an01005d1.pdf [file d2an01005d1.pdf]

*Supporting Information*

**A novel Electrochemiluminescence sensor based on a molecular imprinting technique and UCNPs@ZIF-8 nanocomposites for sensitive determination of imidacloprid.**

Feiyan Tang, Qing Hua, Xiaobin Wang, Luan Feng, Li Wang, Yanhong Li, Xuming Zhuang\*, Chunyuan Tian\*

College of Chemistry and Chemical Engineering, Yantai University, Yantai 264005, China

\*Corresponding author.

E-mail address: cytian@ytu.edu.cn (C. Tian); xmzhuang@iccas.ac.cn (X. Zhuang).

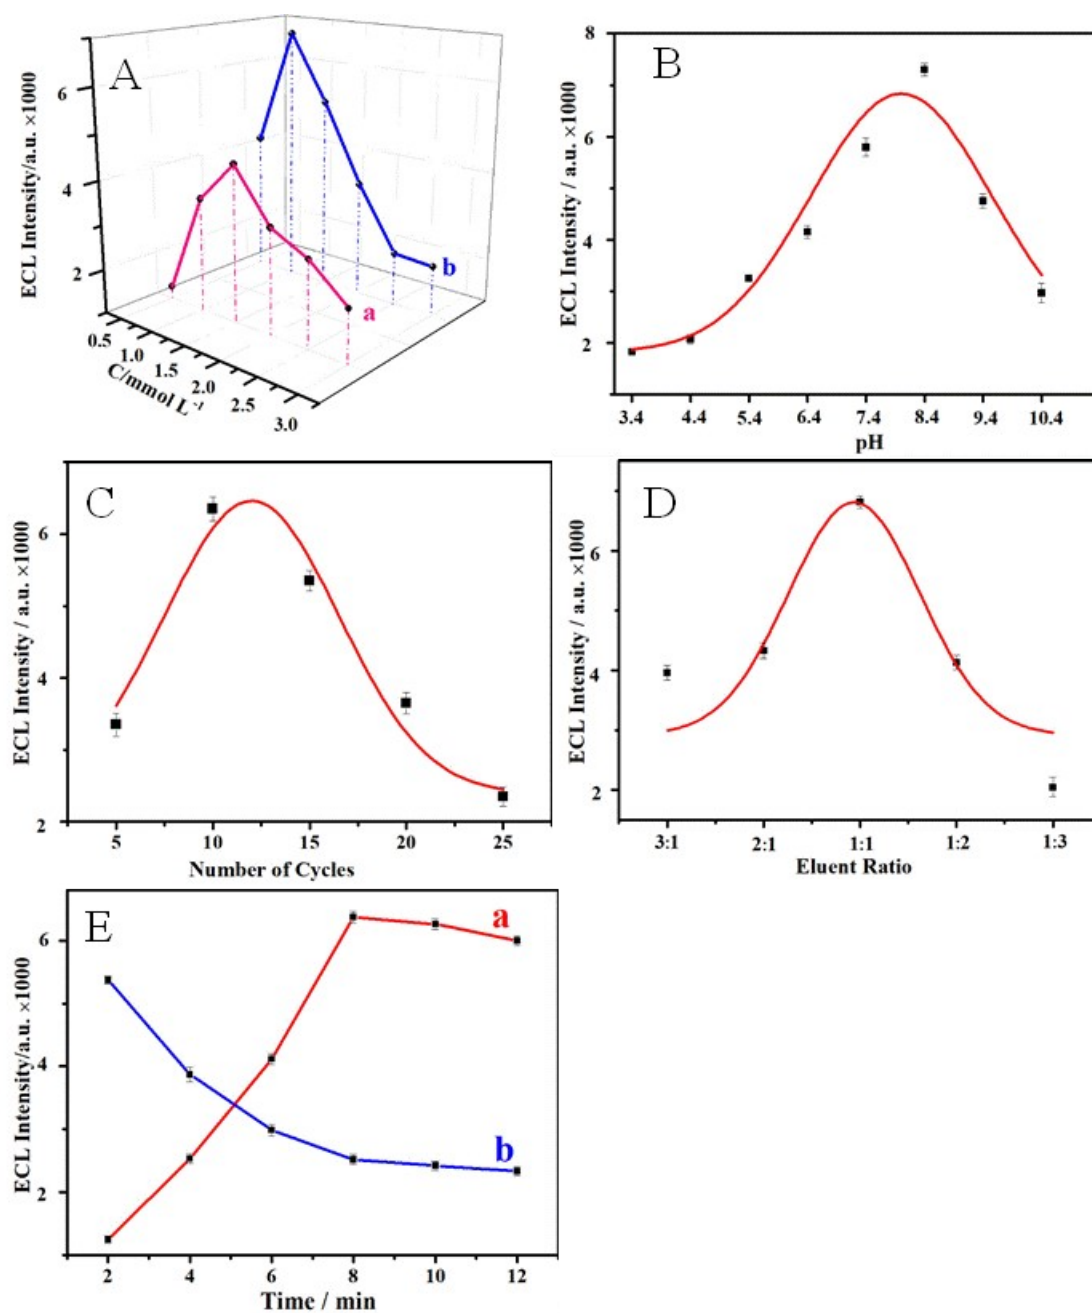

**Fig. S1.** Optimization results for different experimental conditions: (A) the concentration of (a) IM and (b) o-PD, (B) pH of electropolymerization, (C) the number of electropolymerization cycles, (D) the eluent ratio of methanol: Water, (E) the time of (a) elution and (b) adsorption.

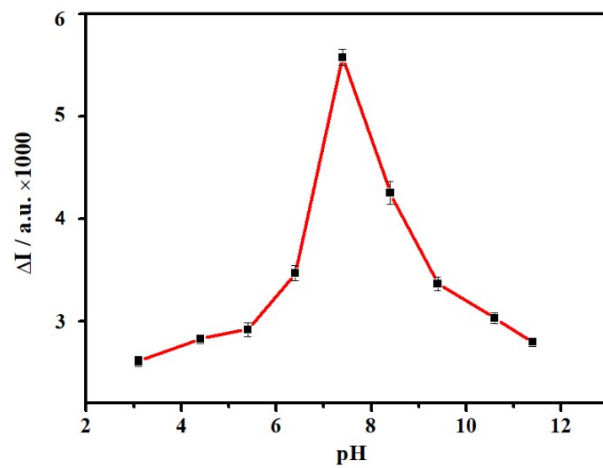

**Fig. S2.** The optimization of pH (3, 3, 4.4, 5.4, 6.4, 7.4, 8.4, 9.4, 10.4, 11.4) for ECL sensor.

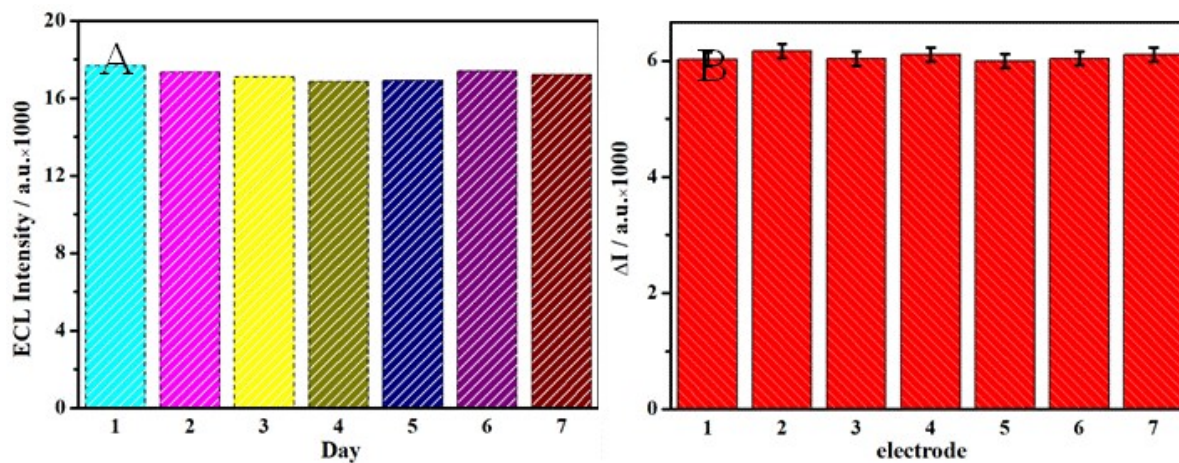

**Fig. S3.** (A) The ECL signal values were measured at the same time every day for the same UCNPs@ZIF-8 modified electrode stored in a 4°C refrigerator for 7 days. (B) Changes in the response signals of the sensors constructed by seven electrodes with the same modification operation to the same concentration of IM in 1 mg L<sup>-1</sup>.

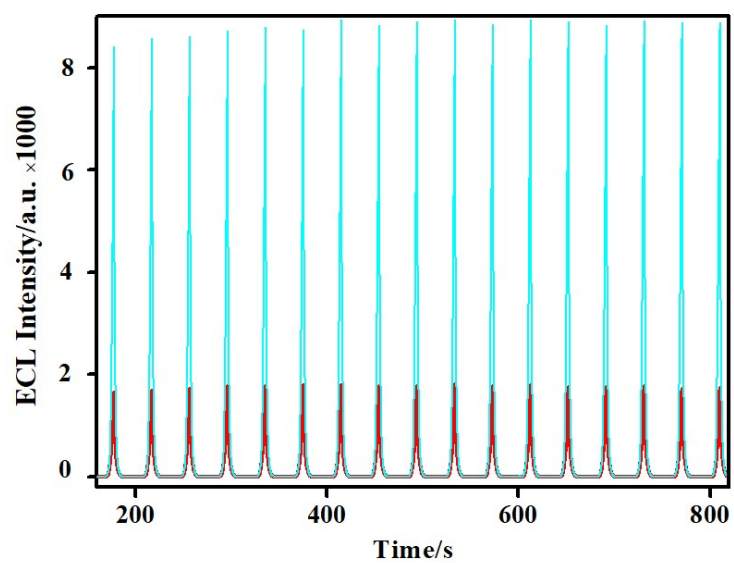

**Fig. S4.** The signal of the MIT-ECL sensor by 17 cycles (The red line and the blue line are before and after removing IM by elution of the MIPs/UCNPs@ZIF-8/GCE, respectively).

**Table S1. Comparison of different probe materials for the detection of IM in the linear range and limit of detection.**

| Probe materials                        | Testing method   | Linear range<br>(g·L <sup>-1</sup> )        | LOD<br>(ng·L <sup>-1</sup> ) | Ref.      |
|----------------------------------------|------------------|---------------------------------------------|------------------------------|-----------|
| Ce-MOF nanowires                       | ECL              | 5.1×10 <sup>-7</sup> -3.1×10 <sup>-5</sup>  | 8.7×10 <sup>1</sup>          | 1         |
| <sup>a</sup> I- <sup>b</sup> IL-Au NPs | Colorimetric     | 2.6×10 <sup>-6</sup> -2.6×10 <sup>-1</sup>  | 1.3×10 <sup>5</sup>          | 2         |
| <sup>c</sup> ERGO                      | Electrochemistry | 7.7×10 <sup>-6</sup> -2.8×10 <sup>-4</sup>  | 2.6×10 <sup>3</sup>          | 3         |
| <sup>d</sup> GQDs/C-dots               | Fluorescence     | 1.3×10 <sup>-6</sup> -1.0×10 <sup>-3</sup>  | 2.1×10 <sup>2</sup>          | 4         |
| UCNPs@ZIF-8                            | ECL              | 1.0×10 <sup>-10</sup> -1.0×10 <sup>-3</sup> | 0.01                         | This work |

<sup>a</sup> imidazole

<sup>b</sup> ionic liquid

<sup>c</sup> electrochemically reduced graphene oxide

<sup>d</sup> graphene- and carbon quantum dots

**Table S2. Determination of IM in fish by the proposed method and the HPLC (n=3).**

| Sample | Added<br>(mg·L <sup>-1</sup> ) | Amount found by<br>MIT-ECL method<br>(mg·L <sup>-1</sup> ) | Amount Found by<br>HPLC Method<br>(mg·L <sup>-1</sup> ) | Relative<br>error<br>(%) |
|--------|--------------------------------|------------------------------------------------------------|---------------------------------------------------------|--------------------------|
| Fish   | 1                              | 0.9502                                                     | 0.9823                                                  | 5%                       |

## References

1. X. Ma, C. Pang, S. Li, ACS Appl. Mater. Interfaces., 2021, **13**, 41987-41996.
2. X. Y. Zhang, Z. Y. Sun, Z. M. Cui, Sens. Actuators B Chem., 2014, **191**, 313-319.
3. L. Yan, Z. C. Li, S. J. Zhang, NANO., 2016, **11**, 1650074.
4. J. M. Luo, S. H. Li, C. H. Pang, Microchem. J., 2022, **175**, 107172.
